# Supplementary material for: A cascaded catalytic hairpin 3D DNA walker-assisted dual-targeting biomimetic sensor for intracellular microRNA imaging
Source: Royal Society of Chemistry journal article supplement (doi:10.1039/d5an01152c), 2025-12-16
Supplement: d5an01152c1.pdf [file d5an01152c1.pdf]

# **Cascaded catalytic hairpin 3D DNA walker-assisted dual-targeting biomimetic sensor for intracellular microRNA imaging**

*Lanlan Jia<sup>a,b</sup>, Jialin Guo<sup>a,b</sup>, Min Li<sup>a,b</sup>, Tingting Zhang<sup>a,b</sup>, Yihan Sun<sup>a,b</sup>,  
Yuxin Chen<sup>a,b</sup>, Xiaoyu Xie<sup>a,b</sup>, Qi Hu<sup>a,b,\*</sup>*

<sup>a</sup> *School of Pharmacy, Health Science Center, Xi'an Jiaotong University, Xi'an, 710061, China*

<sup>b</sup> *Shaanxi Engineering Research Center of Cardiovascular Drugs Screening & Analysis, Xi'an, 710061, China*

## **\*Corresponding Author**

Email: huqi77@xjtu.edu.cn (Q. Hu)

Tel.: +86 29 82656788

# Table of Contents

## Experimental section:

**Materials**

**Apparatus and measurements**

**Cell culture**

## Supporting figures:

**Figure S1.** Characterization of AuNPs-H1.

**Figure S2.** The effect of different numbers of bases of H1 5' end extension on the detection efficiency of AuNPs-H1

**Figure. S3.** The Fluorescence intensity of the DNA walker in the presence or absence of miRNA-21.

**Figure S4.** Cell viability of MCF-7 and MCF-10A cells treated with different concentrations of AuNPs-H1/H2@TCM-apt.

**Figure S5.** CLSM images and fluorescence intensity of MCF-7 cells treated with AuNPs-H1/H2@CM<sub>MCF-10A</sub>.

**Figure S6.** CLSM images of miRNA-21 in MCF-7 cells treated with or without miR-21 inhibitor.

## Supporting table:

**Table S1** Comparison of different methods for miRNA detection

**Table S2** The details of sequences used in the research.

## References

## Experimental section:

### 1. *Materials*

Gold(III) chloride hydrate ( $\text{HAuCl}_4 \cdot 4\text{H}_2\text{O}$ ) and sodium citrate dihydrate ( $\text{C}_6\text{H}_5\text{Na}_3\text{O}_7 \cdot 2\text{H}_2\text{O}$ ) were purchased from Macklin Biochemical Co., Ltd. (Shanghai, China). Cell Counting Kit-8 (CCK-8) was offered by Yeasen Biotechnology Co., Ltd. (Shanghai, China). The  $1 \times \text{TE}$  buffer [ $10 \text{ mmol L}^{-1}$  Tris-HCl,  $1.0 \text{ mmol L}^{-1}$  ethylenediaminetetraacetic acid (EDTA), pH 7.8-8.2] and DEPC water were purchased from Sangon Biotechnology Inc. (Shanghai, China). All DNA and RNA sequences (Table S2) were synthesized and purified by Sangon Biotechnology Inc. (Shanghai, China).

### 2. *Apparatus and measurements*

After ambient air-drying, the morphology of prepared materials was characterized using transmission electron microscope (TEM; JEOL JEM-2100Plus; Tokyo, Japan; 200 kV) and scanning electron microscope (SEM; JEOL JCM-5700; Welwyn Garden City, UK). The hydrodynamic size and zeta potential of prepared materials were measured in PBS (PH 7.4) at 25 °C using dynamic light scattering (DLS; Malvern Zetasizer Nano ZSE; Malvern, UK). The UV-vis absorption spectra were recorded on a UV-3200 spectrophotometer (Mapada, Shanghai, China). Fluorescence spectra were obtained on a RF-6000 fluorophotometer (Shimadzu, Kyoto, Japan). Confocal laser scanning microscopy (CLSM; TCS SP8 STED 3X, Leica; Solms, Germany) was used to obtain cell images.

### 3. *Cell culture*

MCF-7 and MCF-10A cells were obtained from Wuhan Pricella Biotechnology Co., Ltd. (Wuhan, China). Cells were cultured in Dulbecco's modified Eagle's medium (DMEM) supplemented with 1% penicillin–streptomycin and 10% fetal bovine serum (FBS) at 37 °C in a humidified 5% CO<sub>2</sub> incubator.

## Supporting figures

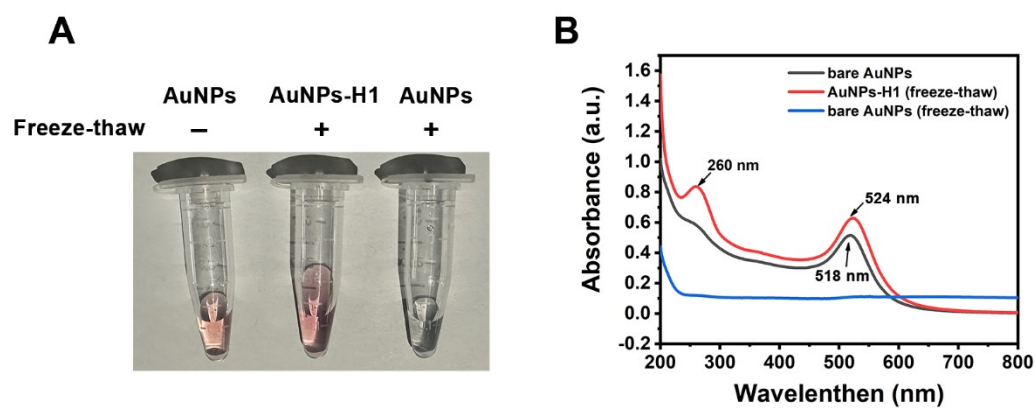

**Figure S1.** Characterization of AuNPs-H1. (A) Photographs showing the color of AuNPs before and after a freeze–thaw cycle in the presence or absence of H1. (B) UV–vis absorption spectra of bare AuNPs, bare AuNPs after freeze–thaw, and AuNPs-H1 after freeze–thaw.

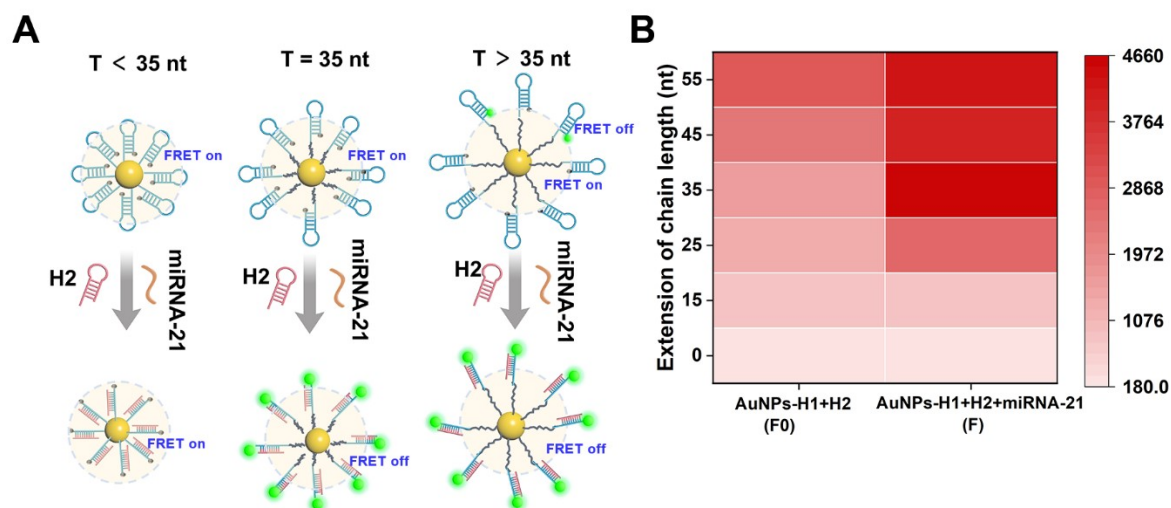

**Figure S2.** The effect of different numbers of bases of H1 5' end extension on the detection efficiency of AuNPs-H1. (A) Schematic diagram. (B) Fluorescence intensity of the DNA walker with different length of H1 strand.

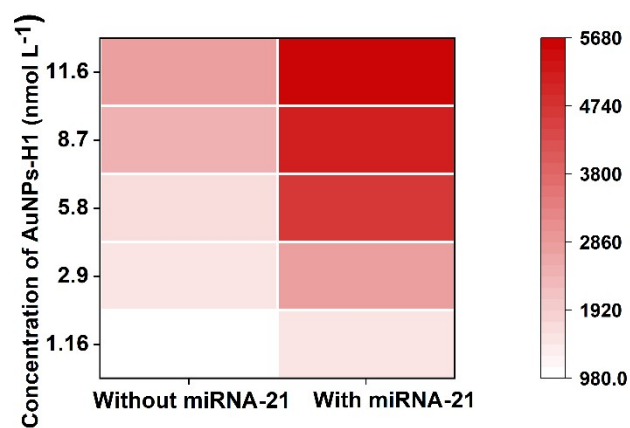

**Figure. S3.** The Fluorescence intensity of the DNA walker in the presence or absence of miRNA-21.

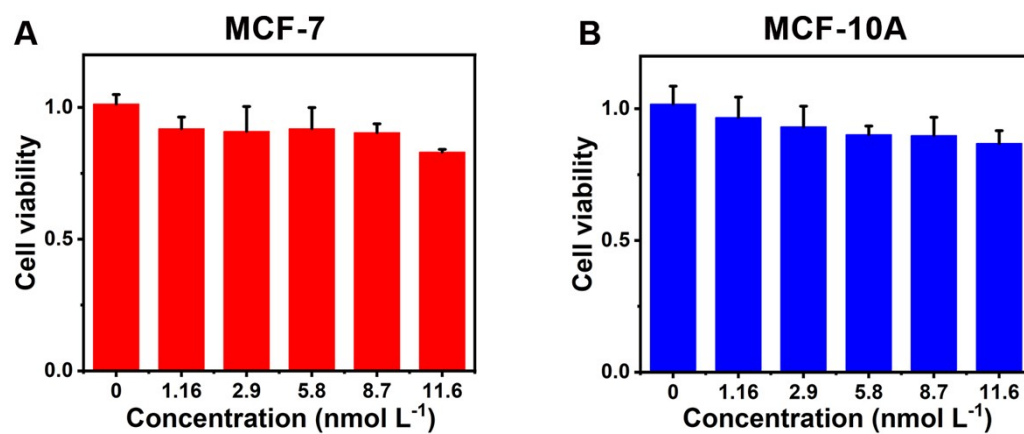

**Figure S4.** Cell viability of (A) MCF-7 and (B) MCF-10A cells treated with different concentrations of AuNPs-H1/H2@TCM-apt. All bars represent means  $\pm$  SD ( $n = 3$ ).



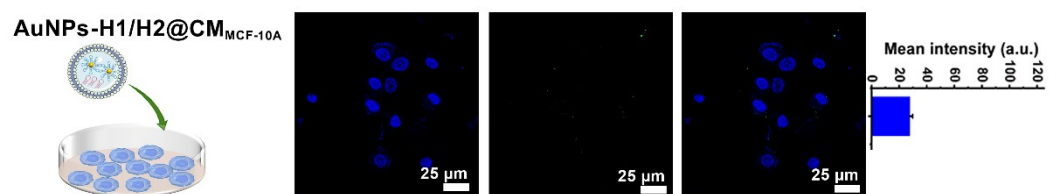

**Figure S5.** CLSM images and fluorescence intensity of MCF-7 cells treated with AuNPs-H1/H2@CM<sub>MCF-10A</sub>. Scale bar = 25 μm.

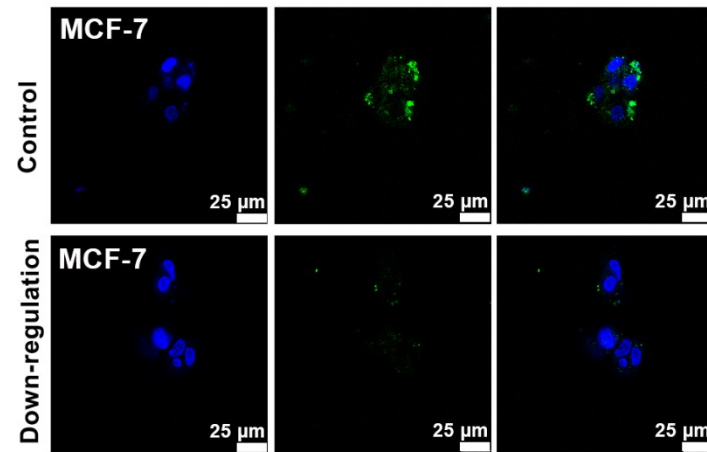

**Figure S6.** CLSM images of miRNA-21 in MCF-7 cells treated with or without miR-21 inhibitor. Scale bar = 25 μm.

## Supporting tables

**Table S1** Comparison of different methods for miRNA detection

| Technology   | Target          | Linear range                                                  | LOD                                                       | Living cells<br>imaging | Ref.         |
|--------------|-----------------|---------------------------------------------------------------|-----------------------------------------------------------|-------------------------|--------------|
| Fluorescence | miRNA-141       | 5-100 nmol L <sup>-1</sup>                                    | 2.5 nmol L <sup>-1</sup>                                  | No                      | [1]          |
| Fluorescence | miRNA-21        | -----                                                         | 1.27 nmol L <sup>-1</sup>                                 | Yes                     | [2]          |
| Colorimetric | miRNA-155       | 1-100 nmol L <sup>-1</sup>                                    | 0.7 nmol L <sup>-1</sup>                                  | No                      | [3]          |
| Fluorescence | miRNA-21, let7a | 0.05-10 nmol L <sup>-1</sup> ,<br>0.05-4 nmol L <sup>-1</sup> | 16.67 nmol L <sup>-1</sup> ,<br>7.14 nmol L <sup>-1</sup> | Yes                     | [4]          |
| Fluorescence | miRNA-155       | 0-30 nmol L <sup>-1</sup>                                     | 0.35 nmol L <sup>-1</sup>                                 | Yes                     | [5]          |
| Fluorescence | miRNA-21        | 1-60 nmol L <sup>-1</sup>                                     | 0.69 nmol L <sup>-1</sup>                                 | Yes                     | [6]          |
| Fluorescence | miRNA-21        | 0-10 nmol L <sup>-1</sup>                                     | 0.46 nmol L <sup>-1</sup>                                 | Yes                     | This<br>work |

**Table S2.** The details of sequences used in the research

| Name                | Sequences (5'-3')                                                                                    |
|---------------------|------------------------------------------------------------------------------------------------------|
| miRNA-21            | UAGCUUAUCAGACUGAUGUUGA                                                                               |
| H1                  | TCAACATCAGTCTGATAAGCGGTAGGGTAGGGCGCTT<br>ATCAGACTGA                                                  |
| T <sub>35</sub> -H1 | SH-<br>TTTTTTTTTTTTTTTTTTTTTTTTTTTTTTTTTTTCAACA<br>TCAGTCTGATAAGCGGTAGGGTAGGGCGCTTATCAGA<br>CTGA-FAM |
| H2                  | TGATAAGCGCCCTACCCTACCGCTTATCAGACTGAGG<br>TAGGGTAGGGCGGGTTGGG                                         |
| AS1411 aptamer      | GGTGGTGGTGGTTGTGGTGGTGGTGG                                                                           |
| miRNA-155           | UUA AUG CUA AUC GUG AUA GGG GU                                                                       |
| miRNA141            | UAACACUGUCUGGUAAAGAUGG                                                                               |
| miRNA-122           | UGG AGU GUG ACA AUG GUG UUU G                                                                        |
| miRNA-210           | CUG UGC GUG UGA CAG CGG CUG A                                                                        |

## References

- [1] M. Q. Liu, R. Shen, H. R. Li, Y. W. Jia, P. I. Mak, R. P. Martins, Ratiometric fluorescence analysis for miR-141 detection with hairpin DNA-templated silver nanoclusters, *J. Mater. Chem. C*, 10, 2022, **10**, 655-664, DOI: 10.1039/d1tc04488e.
- [2] W. Pan, B. Liu, X. N. Gao, Z. Z. Yu, X. H. Liu, N. Li, B. Tang, A graphene-based fluorescent nanoprobe for simultaneous monitoring of miRNA and mRNA in living cells, *Nanoscale*, 2018, **10**, 14264-14271, DOI: 10.1039/c8nr04106g.
- [3] K. Shahsavar, E. Shokri, M. Hosseini, Sensitive colorimetric detection of miRNA-155 via G-quadruplex DNAzyme decorated spherical nucleic acid, *Microchim. Acta*, 2022, **189**, 357, DOI: 10.1007/s00604-022-05455-7.
- [4] Y. X. Wang, D. X. Wang, J. Wang, B. Liu, A. N. Tang, D. M. Kong, DNA nanolanthorn-mediated catalytic hairpin assembly nanoamplifiers for simultaneous detection of multiple microRNAs, *Talanta*, 2022, **236**, 122846, DOI: 10.1016/j.talanta.2021.122846.
- [5] Y. Wang, Y. Bai, L. P. Cao, L. L. Li, L. Zhan, H. Zuo, C. M. Li, C. Z. Huang, Catalytic hairpin assembled polymeric tetrahedral DNA frameworks for MicroRNA imaging in live cells, *Biosens. Bioelectron.*, 2022, **197**, 113783, DOI: 10.1016/j.bios.2021.113783.
- [6] C. Yang, K. Wang, Z. H. Li, L. T. Mo, W. Y. Lin, A two-photon metal-organic framework nanoprobe with catalytic hairpin assembly for amplified MicroRNA imaging in living cells and tissues, *Sensor Actuat B-Chem*, 2022, **359**, 131593, DOI: 10.1016/j.snb.2022.131593.
